# Supplementary material for: Incidence of Treatment for Opioid Use Disorder Following Nonfatal Overdose in Commercially Insured Patients
Source: PubMed Central journal article supplement (PMC7254182; doi:10.1001/jamanetworkopen.2020.5852), 2020-05-27
Supplement: jamanetwopen-3-e205852-s001.pdf [file jamanetwopen-3-e205852-s001.pdf]

## Supplementary Online Content

Kilaru AS, Xiong A, Lowenstein M, et al. Incidence of treatment for opioid use disorder following nonfatal overdose in commercially insured patients. *JAMA Netw Open*. 2020;3(5):e205852. doi:10.1001/jamanetworkopen.2020.5852

**eFigure 1.** Flowchart for Selection of Patient Cohort

**eTable 1.** *ICD-9-CM*, *ICD-10*, CPT, and AHFS Codes for Selection of Patient Cohort and Patient Characteristics

**eTable 2.** National Drug Codes for Medications for Opioid Use Disorder

**eTable 3.** CPT, HCPCS, *ICD-9-CM*, and *ICD-10-CM* Codes for Treatment Encounters

**eTable 4.** Adjusted Probability of Follow-up Treatment After Opioid Overdose for Patients Treated Prior to Overdose

**eTable 5.** Adjusted Probability of MOUD Treatment After Opioid Overdose, Stratified by Treatment Status Prior to Overdose

**eFigure 2.** Kaplan-Meier Failure Curve for Days to First Follow up Treatment Following Index ED Overdose

**eTable 6.** Adjusted Probability of Follow-up Treatment After Opioid Overdose, Excluding Patients Without Known Claims Beyond 90-Day Follow-up Period (Sensitivity Analysis to Address Potential Mortality During Follow-up Period)

**eTable 7.** Index Opioid Overdoses by specific *ICD-9* or *ICD-10* Diagnosis Code, With Number and Frequency for Each Diagnosis Code

**eTable 8.** Patient Cohort and Unadjusted Outcomes, Stratified by Overdose Type and Treatment Status Before Overdose

This supplementary material has been provided by the authors to give readers additional information about their work.

**eFigure 1.** Flowchart for Selection of Patient Cohort

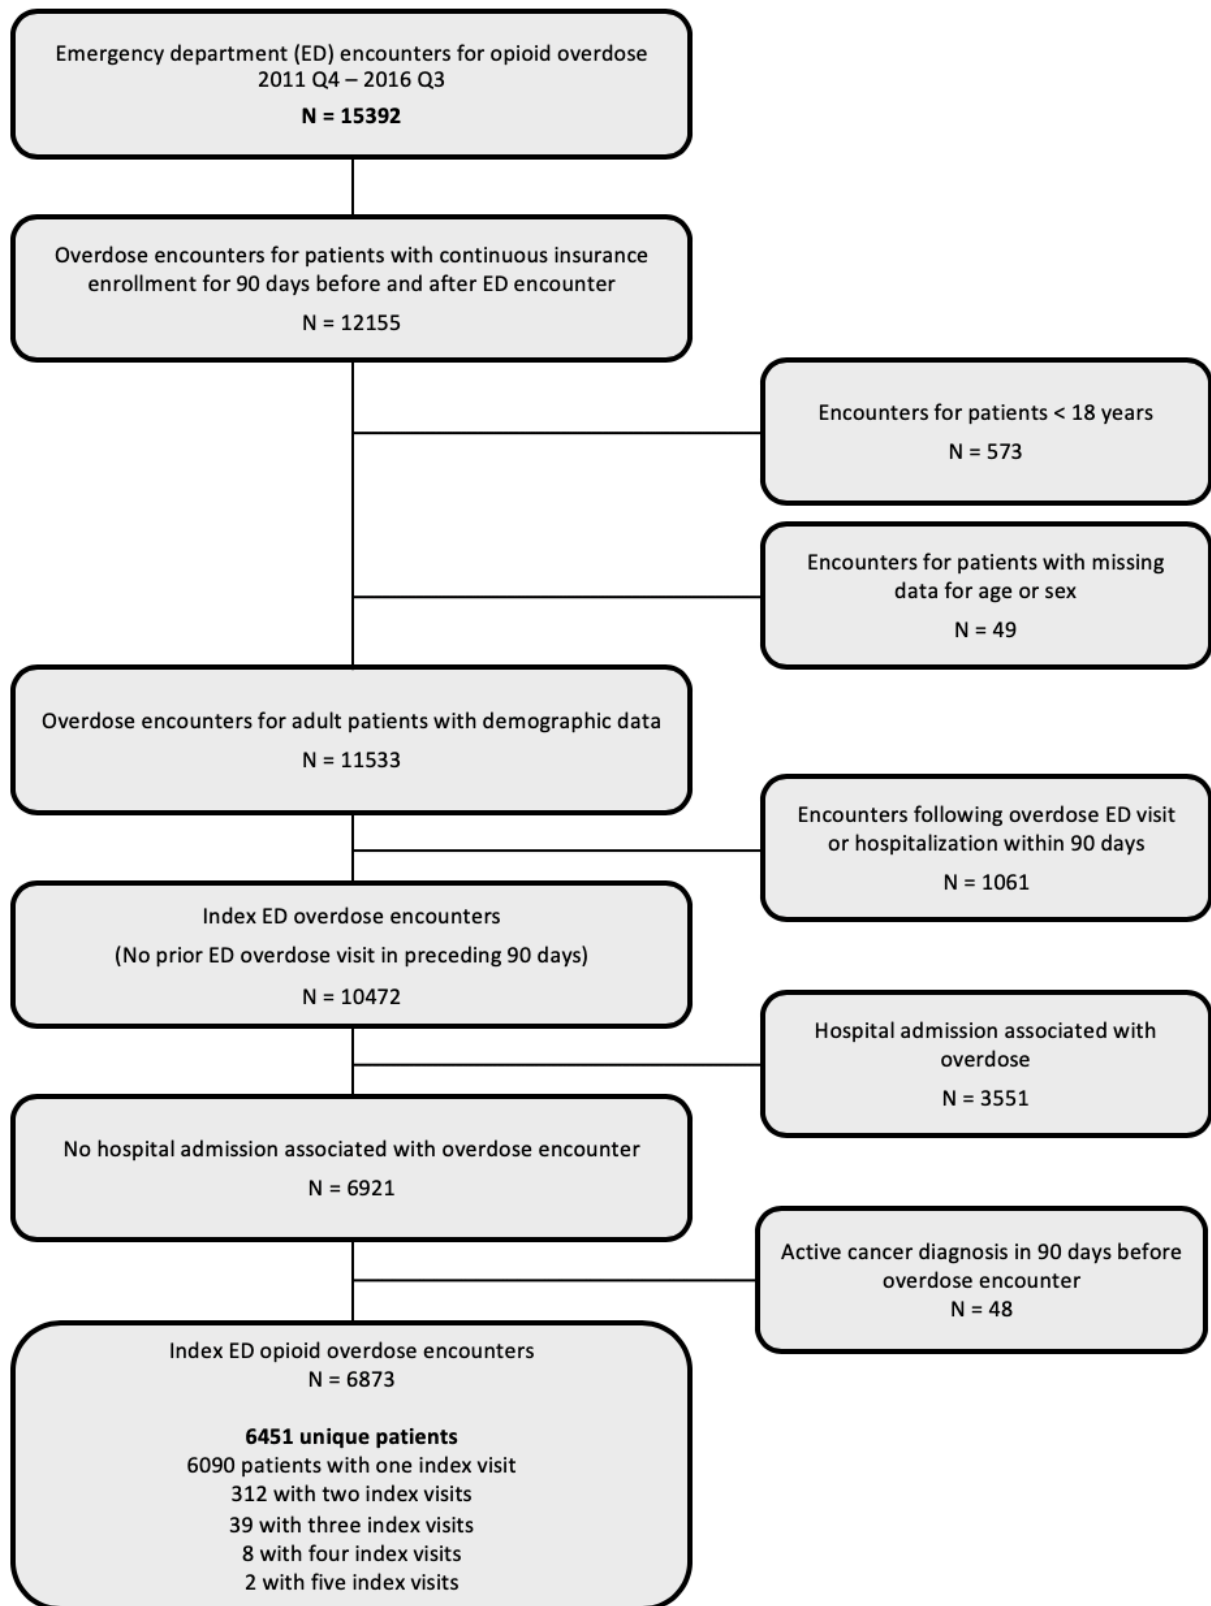

**eTable 1** ICD-9-CM, ICD-10, CPT, and AHFS Codes for Selection of Patient Cohort and Patient Characteristics

|                                                          | ICD-9-CM <sup>a</sup> Diagnosis Codes                                                                                                                                                                                                        | ICD-10 <sup>a</sup> Diagnosis Codes                                                                                                                                                                                                                                                                                                                                                                                     | CPT Codes                                  | AHFS Pharmacologic-Therapeutic Codes |
|----------------------------------------------------------|----------------------------------------------------------------------------------------------------------------------------------------------------------------------------------------------------------------------------------------------|-------------------------------------------------------------------------------------------------------------------------------------------------------------------------------------------------------------------------------------------------------------------------------------------------------------------------------------------------------------------------------------------------------------------------|--------------------------------------------|--------------------------------------|
| <b>Opioid Overdose</b>                                   | Heroin:<br>965.01, E850.0<br><br>Prescription:<br>965.00, 965.02, 965.09,<br>E.850.1, E.850.2                                                                                                                                                | Heroin:<br>T40.1X<br><br>Prescription:<br>T40.0X, T40.2-4X, T40.6X                                                                                                                                                                                                                                                                                                                                                      |                                            |                                      |
| <b>Emergency Department Encounters</b>                   |                                                                                                                                                                                                                                              |                                                                                                                                                                                                                                                                                                                                                                                                                         | 99281,<br>99282,<br>99283,<br>99284, 99285 |                                      |
| <b>Cancer (Malignant Neoplasm)<sup>b</sup> Diagnosis</b> | 140.X – 208.X<br>209.0 – 209.3<br>V10.X                                                                                                                                                                                                      | C00X – C97X                                                                                                                                                                                                                                                                                                                                                                                                             |                                            |                                      |
| <b>Anxiety Diagnosis</b>                                 | 293.84, 300.00, 300.01, 300.02,<br>300.09, 300.10, 300.20, 300.21,<br>300.22, 300.23, 300.29, 300.3,<br>300.5, 300.89, 300.9, 308.0,<br>308.1, 308.2, 308.3, 308.4, 308.9,<br>309.81, 313.0, 313.1, 313.21,<br>313.22, 313.3, 313.82, 313.83 | F06.4, F40.00, F40.01, F40.02, F40.10,<br>F40.11, F40.210, F40.218, F40.220,<br>F40.228, F40.230, F40.231, F40.232,<br>F40.233, F40.240, F40.241, F40.242,<br>F40.243, F40.248, F40.290, F40.291,<br>F40.298, F40.8, F40.9, F41.0, F41.1,<br>F41.3, F41.8, F41.9, F42, F42.2, F42.3,<br>F42.4, F42.8, F42.9, F43.0, F43.10,<br>F43.11, F43.12, F44.9, F45.8, F48.8,<br>F48.9, F93.8, F99, R45.2, R45.5,<br>R45.6, R45.7 |                                            |                                      |
| <b>Depression Diagnosis</b>                              | 296.20, 296.21, 296.22, 296.23,<br>296.24, 296.25, 296.26, 296.30,<br>296.31, 296.32, 296.33, 296.34,<br>296.35, 296.36, 300.4, 311, V79.0                                                                                                   | F32.0, F32.1, F32.2, F32.3, F32.4,<br>F32.5, F32.89, F32.9, F33.0, F33.1,<br>F33.2, F33.3, F33.8, F33.40, F33.41,<br>F33.42, F33.9, F34.1                                                                                                                                                                                                                                                                               |                                            |                                      |
| <b>Prescription Opioid Full Agonist</b>                  |                                                                                                                                                                                                                                              |                                                                                                                                                                                                                                                                                                                                                                                                                         |                                            | 280808                               |
| <b>Benzodiazepine</b>                                    |                                                                                                                                                                                                                                              |                                                                                                                                                                                                                                                                                                                                                                                                                         |                                            | 281208, 282408                       |

<sup>a</sup> ICD-9-CM diagnosis codes are used for any claim prior to October 1 2015. ICD-10 diagnosis codes are used for claims on that date or after.

<sup>b</sup> Benign neoplasms or neoplasms of uncertain behavior were excluded

**eTable 2.** National Drug Codes for Medications for Opioid Use Disorder

|                                                 | National Drug Codes (NDC)                                                                                                                                                                                                                                                                                                                                                                                                                                                                                                                                                                                                                                                                                                                                                                                                                                                                                                                                                                                                                                                                                                                                                                                                                                                                                                                                                                                                                                                                                                                                                                                                                                                                                                                                                                                                                                                                                                                                                                                                                                                                                                                                                                                                                                                                                                                                                                                                                                                                                                                                                                                                                                                                                                                                                                                                                                                                                                                                                                                                                                                                                                                                                                                                                                                                                                                                                                                                                                                                                                                                                                                                                                                                                                                                                                                                                                                                                         |
|-------------------------------------------------|-------------------------------------------------------------------------------------------------------------------------------------------------------------------------------------------------------------------------------------------------------------------------------------------------------------------------------------------------------------------------------------------------------------------------------------------------------------------------------------------------------------------------------------------------------------------------------------------------------------------------------------------------------------------------------------------------------------------------------------------------------------------------------------------------------------------------------------------------------------------------------------------------------------------------------------------------------------------------------------------------------------------------------------------------------------------------------------------------------------------------------------------------------------------------------------------------------------------------------------------------------------------------------------------------------------------------------------------------------------------------------------------------------------------------------------------------------------------------------------------------------------------------------------------------------------------------------------------------------------------------------------------------------------------------------------------------------------------------------------------------------------------------------------------------------------------------------------------------------------------------------------------------------------------------------------------------------------------------------------------------------------------------------------------------------------------------------------------------------------------------------------------------------------------------------------------------------------------------------------------------------------------------------------------------------------------------------------------------------------------------------------------------------------------------------------------------------------------------------------------------------------------------------------------------------------------------------------------------------------------------------------------------------------------------------------------------------------------------------------------------------------------------------------------------------------------------------------------------------------------------------------------------------------------------------------------------------------------------------------------------------------------------------------------------------------------------------------------------------------------------------------------------------------------------------------------------------------------------------------------------------------------------------------------------------------------------------------------------------------------------------------------------------------------------------------------------------------------------------------------------------------------------------------------------------------------------------------------------------------------------------------------------------------------------------------------------------------------------------------------------------------------------------------------------------------------------------------------------------------------------------------------------------------------|
| <b>Buprenorphine and Buprenorphine-Naloxone</b> | 54017613, 54017713, 54018813, 54018913, 74201201, 74201232, 93360021, 93360040, 93360121, 93360140, 93360221, 93360240, 93360321, 93360340, 93537856, 93537956, 93572056, 93572156, 149075701, 228315303, 228315403, 228315473, 228315503, 228315567, 228315573, 228315603, 378092393, 378092493, 406192303, 406192403, 406802003, 409201203, 409201232, 490005100, 490005130, 490005160, 490005190, 12496010001, 12496010002, 12496010005, 12496030001, 12496030002, 12496030005, 12496075701, 12496075705, 12496120201, 12496120203, 12496120401, 12496120403, 12496120801, 12496120803, 12496121201, 12496121203, 12496127802, 12496128302, 12496130602, 12496131002, 16590066605, 16590066630, 16590066705, 16590066730, 16590066790, 21695051510, 23490927003, 23490927006, 23490927009, 35356000407, 35356000430, 35356055530, 35356055630, 35356060504, 35356060704, 38779088800, 38779088801, 38779088803, 38779088805, 38779088806, 38779088809, 40042001001, 42023017901, 42023017905, 42291017430, 42291017530, 42858035340, 42858049340, 42858050103, 42858050203, 42858058640, 42858075040, 42858083940, 43063018407, 43063018430, 43063066706, 43063075306, 49452129201, 49452129202, 49452129203, 49452825301, 49452825302, 49452825303, 49999039507, 49999039515, 49999039530, 49999063830, 49999063930, 50268014411, 50268014415, 50268014511, 50268014515, 50383028793, 50383029493, 50383092493, 50383093093, 51552076501, 51552076502, 51552076505, 51552076506, 51552076509, 51552076510, 51552076550, 51927101200, 52959030430, 52959074930, 53217013830, 54123011430, 54123090730, 54123091430, 54123092930, 54123095730, 54123098630, 54569141600, 54569141601, 54569549600, 54569573900, 54569573901, 54569573902, 54569632500, 54569632600, 54569639900, 54569640800, 54569657800, 54868570700, 54868570701, 54868570702, 54868570703, 54868570704, 54868575000, 55045378403, 55390010010, 55700014730, 55700018430, 55700030230, 55700030330, 55700057904, 58284010014, 59011075004, 59011075104, 59011075204, 59011075704, 59011075804, 59385001201, 59385001230, 59385001401, 59385001430, 59385001601, 59385001630, 59385002101, 59385002160, 59385002201, 59385002260, 59385002301, 59385002360, 59385002401, 59385002460, 59385002501, 59385002560, 59385002601, 59385002660, 59385002701, 59385002760, 60429058611, 60429058630, 60429058633, 60429058711, 60429058730, 60429058733, 62756045983, 62756046083, 62756096983, 62756097083, 62991158301, 62991158302, 62991158303, 62991158304, 62991158306, 62991158307, 62991158308, 63275992201, 63275992202, 63275992203, 63275992204, 63275992205, 63275992207, 63370090506, 63370090509, 63370090510, 63370090515, 63459030042, 63481016101, 63481016160, 63481020701, 63481020760, 63481034801, 63481034860, 63481051901, 63481051960, 63481068501, 63481068560, 63481082001, 63481082060, 63481095201, 63481095260, 63629402801, 63629403401, 63629403402, 63629403403, 63629409201, 63874108403, 63874108503, 63874117303, 65162041503, 65162041603, 65757030001, 65757030202, 66336001630, 68071138003, 68071151003, 68258299103, 68258299903, 68308020230, 68308020830, 35356060604, 53217024630, 55887031204, 55887031215, 63874117403, 66336001530, 406192309, 406192409, 406800503, 50090157100, 55700056804, 60846097003, 60846097103, 62175045232, 62175045832, 62756045964, 62756046064, 62756096964, 62756097064, 63629409202, 63629507401, 63629712501, 63629712502, 63629712503, 63629712504, 63629712505, 63629712506, 63629712507, 63629712601, 63629712602, 63629712603, 63629712604, 63629712605, 63629712606, 63629712607, 63629712608, 63629727001, 63629727002, 64725093003, 64725093004, 64725192403, 64725192404, 65162041509, 65162041609, 71335035301, 71335035302, 71335035303, 71335035304, 71335035305, 71335035306, 71335035307, 76519117000, 76519117001, 76519117002, 76519117003, 76519117004 |

|                   |                                                                                                                                                                                                                                                                                                                                                                                                                                                                  |
|-------------------|------------------------------------------------------------------------------------------------------------------------------------------------------------------------------------------------------------------------------------------------------------------------------------------------------------------------------------------------------------------------------------------------------------------------------------------------------------------|
| <b>Naltrexone</b> | 43063059115, 47335032683, 47335032688, 50436010501, 51224020630, 51224020650, 51285027501, 51285027502, 52152010502, 52152010504, 52152010530, 54868557400, 63459030042, 65694010003, 65694010010, 65757030001, 65757030202, 68084029111, 68084029121, 68094085362, 68115068030, 56001122, 56001130, 56001170, 56007950, 56008050, 185003901, 185003930, 406009201, 406009203, 406117001, 406117003, 555090201, 555090202, 16729008101, 16729008110, 42291063230 |
|-------------------|------------------------------------------------------------------------------------------------------------------------------------------------------------------------------------------------------------------------------------------------------------------------------------------------------------------------------------------------------------------------------------------------------------------------------------------------------------------|

**eTable 3** CPT, HCPCS, ICD-9-CM, and ICD-10-CM Codes for Treatment Encounters

| Current Procedure Terminology (CPT) Codes                                                                                                                                                                                                                                                                                                | Healthcare Common Procedure Coding System (HCPCS) Codes                                                                                                                                                                                                                                                                                                                                                                                                               | ICD-9-CM Diagnosis Codes<br>(claim prior to October 1 2015)                                                            | ICD-10-CM Diagnosis Codes<br>(claim on or after October 1 2015)                                                                                                                                                                                                                                                                                                                                                                                                                                                                                                        |
|------------------------------------------------------------------------------------------------------------------------------------------------------------------------------------------------------------------------------------------------------------------------------------------------------------------------------------------|-----------------------------------------------------------------------------------------------------------------------------------------------------------------------------------------------------------------------------------------------------------------------------------------------------------------------------------------------------------------------------------------------------------------------------------------------------------------------|------------------------------------------------------------------------------------------------------------------------|------------------------------------------------------------------------------------------------------------------------------------------------------------------------------------------------------------------------------------------------------------------------------------------------------------------------------------------------------------------------------------------------------------------------------------------------------------------------------------------------------------------------------------------------------------------------|
| <p>Office or Outpatient Visit:<br/>99201-99205<br/>99211-99215</p> <p>Psychiatric Diagnosis:<br/>90791-90792</p> <p>Psychotherapy Services:<br/>90832-90839<br/>90853<br/>90863<br/>90875-90876<br/>90801-90815<br/>90824<br/>90862</p> <p>Screening, Brief Intervention,<br/>and Referral to Treatment<br/>(SBIRT):<br/>99408-99409</p> | <p>Drug, Alcohol, and Behavioral Health Services (Outpatient and Inpatient):<br/>H0001, H0002<br/>H0004-H0019<br/>H0031-H0040<br/>G0396-G0397</p> <p>Mental Health Services NOS:<br/>H0046-H0047</p> <p>Halfway House / Treatment Program:<br/>H2034-H2036</p> <p>Clinic Visit / Case Management:<br/>T1015-T1017<br/>T1001</p> <p>MOUD Codes:<br/>J0571-J0575<br/>J1230, J2315</p> <p><b>Excluded</b><br/><i>Methadone maintenance therapy:</i><br/><i>H0020</i></p> | <p>304.00-304.03<br/>305.50-305.53<br/>304.70-304.73<br/>965.00-965.02, 965.09<br/>E85.00-E85.02<br/>E93.50-E93.51</p> | <p>Opioid use, abuse, dependence:<br/>F1190, F11920-F11922, F11929<br/>F1193, F1194, F11950-F11951, F11959, F11981, F11982, F11988<br/>F1199, F1110, F11120-F11122,<br/>F1129, F1114, F11150-F11151, F11159, F11181, F11182, F11188, F1119, F1120, F11220-F11222, F11229, F1123, F1124, F11250, F11251, F11259, F11281, F11282, F11288, F1129</p> <p>Poisoning:<br/>T400X1*, T400X2*, T400X3*, T400X4*<br/>T401X1*, T401X2*, T401X3*, T401X4*<br/>T403X1*, T403X2*, T403X3*, T403X4*<br/>T402X1*, T402X2*, T402X3*, T402X4*<br/>T404X1*, T404X2*, T404X3*, T404X4*</p> |

|  |  |  |                                                                                                                                                          |
|--|--|--|----------------------------------------------------------------------------------------------------------------------------------------------------------|
|  |  |  | T40601*, T40602*, T40603*,<br>T40604*<br>T40605*, T40691*, T40692*,<br>T40693*, T40694*, T40695*,<br>T403X5*<br><br>* Position can include A, D, or<br>S |
|--|--|--|----------------------------------------------------------------------------------------------------------------------------------------------------------|



**eTable 4** Adjusted probability of follow-up treatment after opioid overdose for patients treated prior to overdose

|                                                          |              | <b>Average Adjusted Prediction</b><br>(95% CI), % | <b>P</b> |
|----------------------------------------------------------|--------------|---------------------------------------------------|----------|
| <b>Overdose Type</b>                                     |              |                                                   |          |
|                                                          | Prescription | 64.2 (57.5 to 70.7)                               | --       |
|                                                          | Heroin       | 61.3 (56.0 to 66.5)                               | .55      |
| <b>Age (years), mean (SD)</b>                            |              | 62.5 (59.0 to 66.1)                               | .21      |
| <b>Sex</b>                                               |              |                                                   |          |
|                                                          | Male         | 62.2 (57.5 to 70.0)                               | --       |
|                                                          | Female       | 62.7 (57.4 to 68.2)                               | .89      |
| <b>Race/Ethnicity</b>                                    |              |                                                   |          |
|                                                          | White        | 62.8 (58.7 to 66.9)                               | --       |
|                                                          | Black        | 75.9 (63.4 to 88.4)                               | .06      |
|                                                          | Hispanic     | 61.3 (47.3 to 75.3)                               | .84      |
|                                                          | Asian        | 59.6 (13.8 to 105.3)                              | .89      |
|                                                          | Unknown      | 51.7 (39.1 to 64.1)                               | .10      |
| <b>Year</b>                                              |              |                                                   |          |
|                                                          | 2011 Q4      | 48.3 (22.2 to 74.5)                               | --       |
|                                                          | 2012         | 66.0 (56.1 to 75.8)                               | .22      |
|                                                          | 2013         | 66.9 (58.9 to 75.8)                               | .19      |
|                                                          | 2014         | 60.9 (52.8 to 69.0)                               | .37      |
|                                                          | 2015         | 54.8 (46.9 to 62.7)                               | .65      |
|                                                          | 2016 Q1-3    | 66.4 (59.2 to 73.6)                               | .19      |
| <b>Region</b>                                            |              |                                                   |          |
|                                                          | Northeast    | 73.3 (64.7 to 82.0)                               |          |
|                                                          | South        | 58.3 (51.9 to 64.1)                               | .007     |
|                                                          | Midwest      | 67.3 (61.0 to 73.6)                               | .26      |
|                                                          | West         | 53.2 (44.4 to 62.0)                               | .002     |
| <b>Anxiety treatment, 90 d prior to overdose</b>         |              |                                                   |          |
|                                                          | No           | 62.3 (57.6 to 67.1)                               |          |
|                                                          | Yes          | 62.6 (56.8 to 68.5)                               | .94      |
| <b>Depression treatment, 90 d prior to overdose</b>      |              |                                                   |          |
|                                                          | No           | 63.3 (59.0 to 67.6)                               |          |
|                                                          | Yes          | 60.7 (54.1 to 67.2)                               | .53      |
| <b>Prescription opioid claim, 90 d prior to overdose</b> |              |                                                   |          |
|                                                          | No           | 65.1 (60.4 to 69.8)                               |          |
|                                                          | Yes          | 56.9 (48.9 to 64.8)                               | .11      |
| <b>Benzodiazepine claim, 90 d prior to overdose</b>      |              |                                                   |          |
|                                                          | No           | 60.1 (55.4 to 64.7)                               |          |
|                                                          | Yes          | 66.7 (60.7 to 72.6)                               | .10      |

**eTable 5** Adjusted probability of MOUD treatment after opioid overdose, stratified by treatment status prior to overdose

|                                                          |              | No MOUD in 90 days prior to overdose, n = 6131 |          | MOUD in 90 days prior to overdose, n = 320 |          |
|----------------------------------------------------------|--------------|------------------------------------------------|----------|--------------------------------------------|----------|
|                                                          |              | Average Adjusted Prediction (95% CI), %        | <i>P</i> | Average Adjusted Prediction (95% CI), %    | <i>P</i> |
| <b>Overdose Type</b>                                     |              |                                                |          |                                            |          |
|                                                          | Prescription | 3.2 (2.6 to 3.8)                               | --       | 55.8 (45.6 to 66.0)                        | --       |
|                                                          | Heroin       | 6.8 (5.6 to 8.1)                               | < .001   | 53.5 (46.2 to 60.9)                        | .75      |
| <b>Age (years), at mean</b>                              |              | 3.6 (3.0 to 4.1)                               | < .001   | 54.4 (49.2 to 59.6)                        | .22      |
| <b>Sex</b>                                               |              |                                                |          |                                            |          |
|                                                          | Male         | 5.1 (4.5 to 5.7)                               | --       | 54.6 (47.9 to 61.3)                        | --       |
|                                                          | Female       | 3.9 (3.2 to 4.6)                               | .03      | 54.0 (45.0 to 62.9)                        | .92      |
| <b>Race/Ethnicity</b>                                    |              |                                                |          |                                            |          |
|                                                          | White        | 4.8 (4.3 to 5.3)                               | --       | 53.2 (47.1 to 59.3)                        | --       |
|                                                          | Black        | 3.0 (1.6 to 4.4)                               | .03      | 71.8 (50.8 to 92.7)                        | .10      |
|                                                          | Hispanic     | 4.1 (2.3 to 5.9)                               | .47      | 70.4 (50.8 to 90.0)                        | .10      |
|                                                          | Asian        | 5.9 (-.19 to 12.1)                             | .71      | 62.0 (2.6 to 126.7)                        | .79      |
|                                                          | Unknown      | 4.3 (2.6 to 6.0)                               | .60      | 40.5 (20.7 to 60.1)                        | .23      |
| <b>Year</b>                                              |              |                                                |          |                                            |          |
|                                                          | 2011 Q4      | 6.0 (2.9 to 9.2)                               | --       | 27.3 (-3.9 to 58.6)                        | --       |
|                                                          | 2012         | 4.2 (3.0 to 5.5)                               | .29      | 48.8 (34.6 to 63.0)                        | .22      |
|                                                          | 2013         | 6.4 (4.9 to 7.8)                               | .85      | 61.7 (50.4 to 72.9)                        | .05      |
|                                                          | 2014         | 3.4 (2.4 to 4.4)                               | .12      | 58.1 (45.1 to 71.0)                        | .07      |
|                                                          | 2015         | 4.4 (3.4 to 5.5)                               | .35      | 50.4 (37.8 to 63.1)                        | .18      |
|                                                          | 2016 Q1-3    | 4.4 (3.3 to 5.5)                               | .33      | 54.2 (42.6 to 65.9)                        | .11      |
| <b>Region</b>                                            |              |                                                |          |                                            |          |
|                                                          | Northeast    | 4.4 (3.0 to 5.9)                               | --       | 55.3 (40.0 to 70.7)                        | --       |
|                                                          | South        | 5.1 (4.2 to 6.0)                               | .46      | 51.9 (43.4 to 60.4)                        | .70      |
|                                                          | Midwest      | 3.9 (3.0 to 4.8)                               | .52      | 58.7 (48.7 to 68.8)                        | .72      |
|                                                          | West         | 4.8 (3.6 to 5.9)                               | .75      | 52.6 (40.0 to 65.4)                        | .79      |
| <b>Anxiety treatment, 90 d prior to overdose</b>         |              |                                                |          |                                            |          |
|                                                          | No           | 4.3 (3.7 to 4.9)                               | --       | 54.5 (47.3 to 61.7)                        | --       |
|                                                          | Yes          | 5.4 (4.2 to 6.6)                               | .13      | 54.1 (45.2 to 63.0)                        | .95      |
| <b>Depression treatment, 90 d prior to overdose</b>      |              |                                                |          |                                            |          |
|                                                          | No           | 4.4 (3.8 to 5.0)                               | --       | 59.0 (52.7 to 65.3)                        | --       |
|                                                          | Yes          | 5.0 (3.8 to 6.3)                               | .39      | 42.9 (32.5 to 53.2)                        | .01      |
| <b>Prescription opioid claim, 90 d prior to overdose</b> |              |                                                |          |                                            |          |
|                                                          | No           | 4.3 (3.6 to 4.9)                               | --       | 57.0 (50.4 to 63.4)                        | --       |
|                                                          | Yes          | 5.1 (4.0 to 6.2)                               | .22      | 47.3 (35.2 to 59.3)                        | .20      |
| <b>Benzodiazepine claim, 90 d prior to overdose</b>      |              |                                                |          |                                            |          |
|                                                          | No           | 4.0 (3.4 to 4.6)                               | --       | 53.9 (46.8 to 61.0)                        | --       |
|                                                          | Yes          | 6.2 (2.9 to 7.5)                               | .003     | 55.0 (46.3 to 63.8)                        | .86      |
| <b>Outpatient OUD Treatment, 90 d prior to overdose</b>  |              |                                                |          |                                            |          |
|                                                          | No           | 4.0 (3.5 to 4.5)                               | --       | 50.9 (42.6 to 59.1)                        | --       |
|                                                          | Yes          | 10.1 (7.5 to 12.7)                             | < .001   | 57.2 (50.0 to 64.5)                        | .27      |

**eFigure 2**

Kaplan-Meier Failure Curve for Days to First Follow Up Treatment Following Index ED Overdose<sup>a</sup>

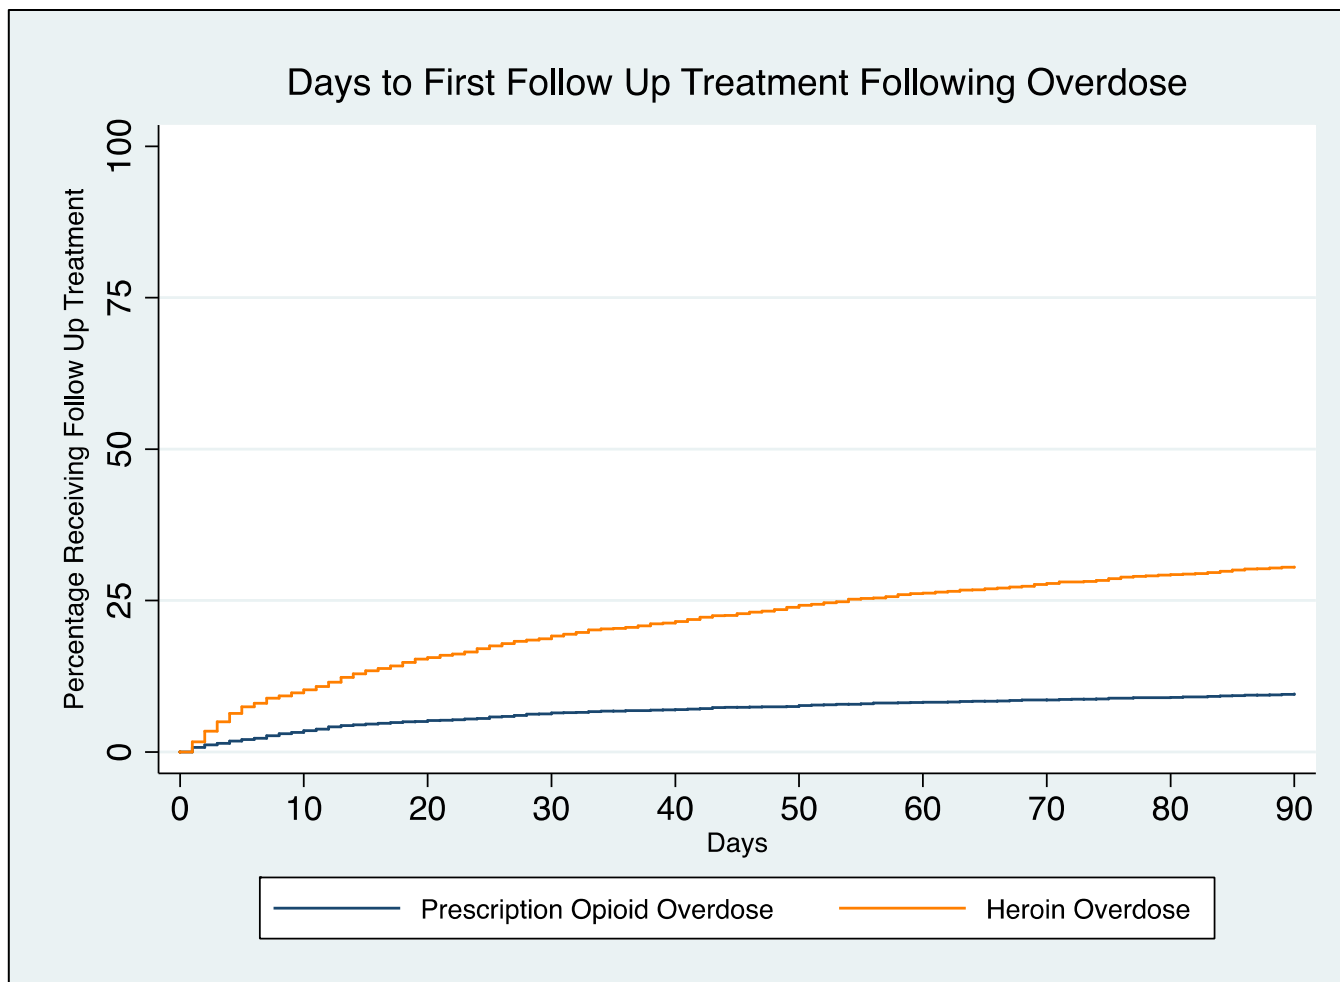

<sup>a</sup>Follow up treatment includes claim for OUD treatment encounter or pharmacy claim for MOUD

**eTable 6** Adjusted probability of follow-up treatment after opioid overdose, excluding patients without known claims beyond 90-day follow-up period (sensitivity analysis to address potential mortality during follow-up period).

|                                                          |              | No MOUD in 90 days prior to overdose, n = 6131 |         | MOUD in 90 days prior to overdose, n = 320 |      |
|----------------------------------------------------------|--------------|------------------------------------------------|---------|--------------------------------------------|------|
|                                                          |              | Average Adjusted Prediction (95% CI), %        | P       | Average Adjusted Prediction (95% CI), %    | P    |
| <b>Overdose Type</b>                                     |              |                                                |         |                                            |      |
|                                                          | Prescription | 8.5 (7.5 to 9.4)                               | --      | 64.2 (57.5 to 70.1)                        | --   |
|                                                          | Heroin       | 18.0 (15.8 to 20.2)                            | < .001  | 62.2 (56.8 to 67.6)                        | .69  |
| <b>Age (years), mean (SD)</b>                            |              | 10.1 (9.3 to 11.0)                             | < .001  | 63.1 (59.5 to 66.7)                        | .22  |
| <b>Sex</b>                                               |              |                                                |         |                                            |      |
|                                                          | Male         | 12.4 (11.3 to 13.7)                            | --      | 62.5 (57.7 to 67.3)                        | --   |
|                                                          | Female       | 10.4 (9.2 to 11.5)                             | .01     | 63.7 (58.2 to 69.1)                        | .76  |
| <b>Race/Ethnicity</b>                                    |              |                                                |         |                                            |      |
|                                                          | White        | 12.5 (11.6 to 13.4)                            | --      | 63.3 (59.2 to 67.4)                        | --   |
|                                                          | Black        | 6.3 (4.1 to 8.6)                               | < 0.001 | 75.8 (63.2 to 88.4)                        | .06  |
|                                                          | Hispanic     | 9.1 (6.8 to 11.4)                              | .02     | 60.8 (46.6 to 74.9)                        | .73  |
|                                                          | Asian        | 11.1 (3.2 to 19.1)                             | .75     | 60.0 (14.4 to 105.6)                       | .89  |
|                                                          | Unknown      | 10.3 (7.6 to 13.1)                             | .15     | 53.0 (40.1 to 65.9)                        | .14  |
| <b>Year</b>                                              |              |                                                |         |                                            |      |
|                                                          | 2011 Q4      | 12.4 (8.0 to 16.7)                             | --      | 48.2 (22.0 to 74.2)                        | --   |
|                                                          | 2012         | 9.5 (7.7 to 11.4)                              | .24     | 66.2 (56.3 to 76.0)                        | .21  |
|                                                          | 2013         | 11.7 (9.7 to 13.6)                             | .77     | 66.6 (58.6 to 74.7)                        | .19  |
|                                                          | 2014         | 10.2 (8.4 to 11.9)                             | .36     | 61.0 (52.9 to 69.1)                        | .36  |
|                                                          | 2015         | 13.5 (11.7 to 15.4)                            | .62     | 56.7 (48.7 to 64.7)                        | .54  |
|                                                          | 2016 Q1-3    | 11.9 (10.1 to 13.8)                            | .86     | 67.0 (59.7 to 74.2)                        | .17  |
| <b>Region</b>                                            |              |                                                |         |                                            |      |
|                                                          | Northeast    | 14.3 (11.9 to 16.8)                            | --      | 73.2 (64.5 to 81.8)                        | --   |
|                                                          | South        | 10.7 (9.5 to 11.8)                             | .02     | 58.9 (52.3 to 65.4)                        | .01  |
|                                                          | Midwest      | 11.4 (9.9 to 13.0)                             | .06     | 68.3 (62.0 to 74.7)                        | .37  |
|                                                          | West         | 11.6 (9.8 to 13.4)                             | .09     | 53.5 (44.6 to 62.3)                        | .002 |
| <b>Anxiety treatment, 90 d prior to overdose</b>         |              |                                                |         |                                            |      |
|                                                          | No           | 10.7 (9.8 to 11.6)                             | --      | 63.1 (58.2 to 67.9)                        | --   |
|                                                          | Yes          | 14.0 (11.9 to 16.1)                            | .01     | 63.0 (57.1 to 68.9)                        | .98  |
| <b>Depression treatment, 90 d prior to overdose</b>      |              |                                                |         |                                            |      |
|                                                          | No           | 11.4 (10.5 to 12.3)                            | --      | 63.9 (59.6 to 68.3)                        | --   |
|                                                          | Yes          | 11.8 (9.9 to 13.8)                             | .70     | 61.0 (57.0 to 68.9)                        | .49  |
| <b>Prescription opioid claim, 90 d prior to overdose</b> |              |                                                |         |                                            |      |
|                                                          | No           | 11.5 (10.4 to 12.7)                            | --      | 65.8 (61.0 to 70.6)                        | --   |
|                                                          | Yes          | 11.4 (10.0 to 12.9)                            | .93     | 57.3 (49.4 to 65.3)                        | .11  |
| <b>Benzodiazepine claim, 90 d prior to overdose</b>      |              |                                                |         |                                            |      |
|                                                          | No           | 10.8 (9.8 to 11.7)                             | --      | 60.5 (55.8 to 65.1)                        | --   |
|                                                          | Yes          | 13.3 (11.5 to 15.1)                            | .02     | 67.4 (61.4 to 73.4)                        | .08  |

**eTable7** Index Opioid Overdoses by specific ICD-9 or ICD-10 Diagnosis Code, with number and frequency for each diagnosis code

| <b>Diagnosis Code</b>                   | <b>Definition</b>                                                                     | <b>Number</b> | <b>Frequency (%)</b> |
|-----------------------------------------|---------------------------------------------------------------------------------------|---------------|----------------------|
| <b>965.00</b>                           | <b>Poisoning by opium (unspecified)</b>                                               | <b>1135</b>   | <b>17.59</b>         |
| <b>965.01</b>                           | <b>Poisoning by heroin</b>                                                            | <b>1209</b>   | <b>18.74</b>         |
| 965.02                                  | Poisoning by methadone                                                                | 139           | 2.15                 |
| <b>965.09</b>                           | <b>Poisoning by other opiates and related narcotics</b>                               | <b>2243</b>   | <b>34.77</b>         |
| E.850.0                                 | Accidental poisoning by heroin                                                        | 4             | 0.06                 |
| E.850.1                                 | Accidental poisoning by methadone                                                     | 2             | 0.03                 |
| E.850.2                                 | Accidental poisoning by other opiates and related narcotics                           | 21            | 0.33                 |
| <i>ICD-10 [Starting October 1 2015]</i> |                                                                                       |               |                      |
| T400X1A                                 | Poisoning by opium, accidental (unintentional), initial encounter                     | 28            | 0.43                 |
| T400X2A                                 | Poisoning by opium, intentional self-harm, initial encounter                          | 2             | 0.03                 |
| T400X4A                                 | Poisoning by opium, undetermined, initial encounter                                   | 3             | 0.05                 |
| <b>T401X1A</b>                          | <b>Poisoning by heroin, accidental (unintentional), initial encounter</b>             | <b>535</b>    | <b>8.29</b>          |
| T401X2A                                 | Poisoning by heroin, intentional self-harm, initial encounter                         | 38            | 0.59                 |
| T401X4A                                 | Poisoning by heroin, undetermined, initial encounter                                  | 51            | 0.79                 |
| <b>T402X1A</b>                          | <b>Poisoning by other opioids, accidental (unintentional), initial encounter</b>      | <b>579</b>    | <b>8.98</b>          |
| T402X1D                                 | Poisoning by other opioids, accidental (unintentional), subsequent encounter          | 2             | 0.03                 |
| T402X1S                                 | Poisoning by other opioids, accidental (unintentional), sequelae                      | 1             | 0.02                 |
| T402X2A                                 | Poisoning by other opioids, intentional self-harm, initial encounter                  | 160           | 2.48                 |
| T402X4A                                 | Poisoning by other opioids, undetermined, initial encounter                           | 62            | 0.96                 |
| T403X1A                                 | Poisoning by methadone, accidental (unintentional), initial encounter                 | 40            | 0.62                 |
| T403X2A                                 | Poisoning by methadone, intentional self-harm, initial encounter                      | 6             | 0.09                 |
| T403X4A                                 | Poisoning by methadone, undetermined                                                  | 1             | 0.02                 |
| T404X1A                                 | Poisoning by other synthetic narcotics, accidental (unintentional), initial encounter | 119           | 1.84                 |
| T404X2A                                 | Poisoning by other synthetic narcotics, intentional self-harm, initial encounter      | 51            | 0.79                 |
| T404X4A                                 | Poisoning by other synthetic narcotics, undetermined, initial encounter               | 20            | 0.31                 |
| <b>TOTAL</b>                            |                                                                                       | <b>6451</b>   | <b>100.00</b>        |

**eTable 8** Patient cohort and unadjusted outcomes, stratified by overdose type and treatment status before overdose

| Index Emergency Department Opioid Overdose<br>n = 6451                                                                                                                                                                                                                                                                                                          |                                                                |                                                           |                                                                |                                                           |
|-----------------------------------------------------------------------------------------------------------------------------------------------------------------------------------------------------------------------------------------------------------------------------------------------------------------------------------------------------------------|----------------------------------------------------------------|-----------------------------------------------------------|----------------------------------------------------------------|-----------------------------------------------------------|
| <div style="display: flex; justify-content: space-around;"> <div style="border: 1px solid black; padding: 5px; text-align: center;"> <b>Heroin Overdose</b><br/>1896 (29.4%)                 </div> <div style="border: 1px solid black; padding: 5px; text-align: center;"> <b>Prescription Opioid Overdose</b><br/>4555 (70.6%)                 </div> </div> |                                                                |                                                           |                                                                |                                                           |
|                                                                                                                                                                                                                                                                                                                                                                 | No MOUD or Treatment,<br>90d prior to overdose<br>1476 (22.9%) | MOUD or Treatment,<br>90d prior to overdose<br>420 (6.5%) | No MOUD or Treatment,<br>90d prior to overdose<br>4293 (66.5%) | MOUD or Treatment,<br>90d prior to overdose<br>262 (4.1%) |
| Both MOUD and Treatment Encounter,<br>90d after index opioid overdose                                                                                                                                                                                                                                                                                           | 64 (4.3%)                                                      | 101 (24.0%)                                               | 46 (1.1%)                                                      | 38 (14.5%)                                                |
| Only MOUD Claim,<br>90d after index opioid overdose                                                                                                                                                                                                                                                                                                             | 51 (3.5%)                                                      | 52 (12.4%)                                                | 62 (1.4%)                                                      | 40 (15.3%)                                                |
| Only Treatment Encounter,<br>90d after index opioid overdose                                                                                                                                                                                                                                                                                                    | 211 (14.3%)                                                    | 121 (28.8%)                                               | 209 (4.9%)                                                     | 74 (28.2%)                                                |
| No MOUD or Treatment Encounter,<br>90d after index opioid overdose                                                                                                                                                                                                                                                                                              | 1150 (77.9%)                                                   | 146 (34.8%)                                               | 3976 (92.6%)                                                   | 110 (42.0%)                                               |
